# Supplementary material
Source: PubMed Central journal article supplement (PMC4451709)
Supplement: chest_147_6_1549_ds01.pdf [file chest_147_6_1549_ds01.pdf]

## Short Telomeres, Telomeropathy, and Subclinical Extrapulmonary Organ Damage in Patients With Interstitial Lung Disease

*Gautam George, MD; Ivan O. Rosas, MD; Ye Cui, MD, PhD; Caitlin McKane, RN; Gary M. Hunninghake, MD; Phillip C. Camp, MD; Benjamin A. Raby, MD; Hilary J. Goldberg, MD, MPH; and Souheil El-Chemaly, MD, MPH*

CHEST 2015; 147(6):1549-1557

**e-Table 1:** Criteria for telomere testing

| 22 patients tested for short telomeres |              |        |                  |                              |     |                           |                |               |              |
|----------------------------------------|--------------|--------|------------------|------------------------------|-----|---------------------------|----------------|---------------|--------------|
|                                        | Macrocytosis | Anemia | Thrombocytopenia | Abnormal coagulation profile | HSM | Fatty liver/ abnormal LFT | Family history |               |              |
|                                        |              |        |                  |                              |     |                           | FIP            | Early graying | Cirrhosis/AA |
| Tested for telomere length (N)         | 19           | 5      | 4                | 2                            | 0   | 6                         | 10             | 10            | 1            |
| Confirmed short telomeres (N)          | 13           | 5      | 2                | 1                            | 0   | 4                         | 7              | 8             | 1            |

AA = aplastic anemia

FIP = familial interstitial pneumonia

LFT = liver function test

HSM= Hepatosplenomegaly

*Online supplements are not copyedited prior to posting.*

**e-Table 2:** Summary of demographic and laboratory data.

|                           | Not suspected of short telomere<br>N=97 | Suspected of short telomere<br>N=30 |
|---------------------------|-----------------------------------------|-------------------------------------|
| Age                       | 62.46 ± 8.73                            | 63.39 ± 7.11                        |
| Female (%)                | 36 (36.7)                               | 11 (36.6)                           |
| Diagnosis (biopsy proven) |                                         |                                     |
| IPF                       | 60 (44)                                 | 16 (11)                             |
| Unclassified              | 12 (8)                                  | 7 (4)                               |
| NSIP                      | 10 (7)                                  | 2 (2)                               |
| CPFE                      | 11 (4)                                  | 3 (2)                               |
| HP                        | 3 (2)                                   | 2 (2)                               |
| LCH                       | 1 (1)                                   | -                                   |
| Mean corpuscular volume*  | 90.5 ± 5.04                             | 97.8 ± 5.68                         |
| Hemoglobin                | 14.24 ± 3.34                            | 13.5 ± 2.98                         |
| Platelets <sup>^</sup>    | 272 ± 79                                | 225 ± 59                            |

\*p<0.0001; <sup>^</sup>p<0.001

CPFE: Combined pulmonary fibrosis emphysema

HP: hypersensitivity pneumonitis

IPF: idiopathic pulmonary fibrosis

LCH: Langerhans cell histiocytosis

NSIP: Non-specific interstitial pneumonia

*Online supplements are not copyedited prior to posting.*

**e-Table 3:** Demographic and clinical data of patients tested for short telomeres

| Subject                       | Sex, Age | Biopsy | Familial | Other familial traits      | Hematologic abnormality | Hepatic abnormality    | Telomere length |
|-------------------------------|----------|--------|----------|----------------------------|-------------------------|------------------------|-----------------|
| Idiopathic pulmonary fibrosis |          |        |          |                            |                         |                        |                 |
| 1                             | M, 48    | Yes    | No       | Early graying              | M                       | N                      | Short           |
| 2                             | M, 58    | No     | Yes      | Early graying              | N                       | N                      | Short           |
| 3                             | F, 45    | Yes    | Yes      | No                         | N                       | Fatty liver            | Normal          |
| 4                             | F, 68    | Yes    | No       | No                         | A, M                    | N                      | Short           |
| 5                             | M, 72    | No     | No       | No                         | M                       | N                      | Short           |
| 6                             | M, 63    | Yes    | Yes      | Early graying              | M                       | N                      | Normal          |
| 7                             | M, 71    | Yes    | No       | No                         | A, M                    | N                      | Short           |
| 8                             | M, 58    | No     | No       | No                         | A, M,T                  | N                      | Short           |
| 9                             | M, 58    | No     | Yes      | Cirrhosis, aplastic anemia | A, M,T                  | Low albumin            | Short           |
| 10                            | F, 59    | No     | Yes      | Early graying              | N                       | Elevated AST/ALT/ALK P | Short           |

*Online supplements are not copyedited prior to posting.*



|                                         |       |     |     |               |      |             |        |
|-----------------------------------------|-------|-----|-----|---------------|------|-------------|--------|
| 11                                      | F, 56 | Yes | Yes | No            | M    | N           | Short  |
| Non specific interstitial pneumonia     |       |     |     |               |      |             |        |
| 12                                      | F, 54 | Yes | No  | No            | M    | N           | Normal |
| Hypersensitivity pneumonitis            |       |     |     |               |      |             |        |
| 13                                      | F, 51 | Yes | No  | Early graying | M    | Low protein | Short  |
| 14                                      | F, 66 | Yes | No  | Early graying | A, M | N           | Short  |
| Unclassified interstitial pneumonia 5   |       |     |     |               |      |             |        |
| 15                                      | M, 69 | No  | No  | No            | M    | N           | Normal |
| 16                                      | M, 65 | Yes | Yes | Early graying | M    | N           | Normal |
| 17                                      | M, 54 | Yes | Yes | Early graying | M    | N           | Short  |
| 18                                      | M, 70 | No  | No  | No            | M    | N           | Normal |
| 19                                      | M, 57 | No  | N   | N             | M, T | N           | Short  |
| Combined Pulmonary Fibrosis Emphysema 3 |       |     |     |               |      |             |        |
| 20                                      | M, 54 | No  | Yes | Early graying | M    | N           | Short  |

*Online supplements are not copyedited prior to posting.*

|    |       |     |     |               |      |                          |        |
|----|-------|-----|-----|---------------|------|--------------------------|--------|
| 21 | M, 68 | Yes | No  | No            | M, T | Low protein and globulin | Normal |
| 22 | M, 60 | Yes | Yes | Early graying | M    | Fatty                    | Short  |

A = anemia

ALT= Alanine Aminotransferase

ALK P= Alkaline Phosphatase

AST= Aspartate Aminotransferase

M = macrocytosis

N = normal

T = thrombocytopenia

**e-Table 4:** Absolute and age-adjusted telomere length in leukocyte subtypes in patients with normal and abnormal bone marrow biopsies

|                                                             | Lymphocytes  | Granulocytes | Naïve T-cells | Memory T-cells | B-Lymphocytes | Natural Killers |
|-------------------------------------------------------------|--------------|--------------|---------------|----------------|---------------|-----------------|
| Absolute telomere length                                    |              |              |               |                |               |                 |
| Normal marrow (n=5)                                         | 4.38 ± 0.54  | 4.92 ± 0.33  | 4.40 ± 0.39#  | 4.37 ± 0.40#   | 6.00 ± 0.80#  | 3.85 ± 0.57#    |
| Hypocellular marrow (n=8)                                   | 4.02 ± 0.64  | 4.98 ± 0.50  | 4.27 ± 0.82   | 3.78 ± 0.60    | 5.42 ± 0.71^  | 3.68 ± 0.55^    |
| Age adjusted telomere length to the 50th percentile for age |              |              |               |                |               |                 |
| Normal marrow (n=5)                                         | -1.74 ± 0.54 | -2.98 ± 0.29 | -2.12 ± 0.31# | -1.13 ± 0.39#  | -1.55 ± 0.82# | -1.77 ± 0.63#   |
| Hypocellular marrow (n=8)                                   | -2.08 ± 0.72 | -2.90 ± 0.57 | -2.30 ± 1.00  | -1.71 ± 0.67   | -2.11 ± 0.76^ | -1.91 ± 0.63^   |

#n=4; ^n=7

*Online supplements are not copyedited prior to posting.*

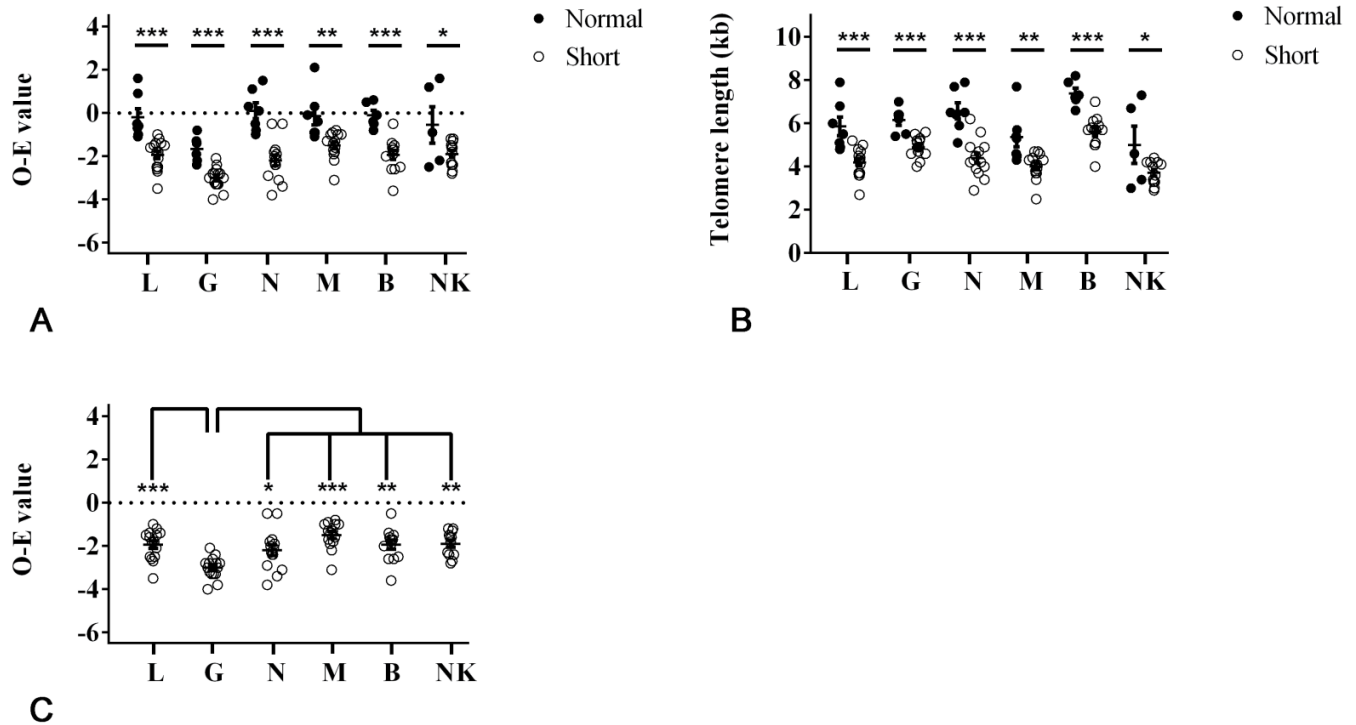

**Supplemental e-Figure 1:** Telomere length measurements in leukocyte subsets from patients with normal telomere length (black circle) versus patients with short telomeres (open circle). Leukocyte subtypes that were tested: lymphocytes (L) (n=7♂, 15♀), granulocytes (G) (n=6♂, 15♀), “naïve” T lymphocytes (CD45RA+) (N) (n=7♂, 14♀), memory T lymphocytes (CD45RA-) (M) (n=6♂, 13♀), B lymphocytes (CD20+) (B) (n=6♂, 13♀), and natural killer (CD57+) (NK) (n=5♂, 12♀). Shown are samples represented by a circle as well as mean and standard deviation of each subtype. In A) difference in telomere length between observed – expected value at the 50<sup>th</sup> percentile, with dotted line representing no difference between expected and observed telomere length. In B) absolute telomere length is shown. (Differences assessed using student *t*-test; \* P < 0.05; \*\* P < 0.01; \*\*\* P < 0.001). In C) Age-adjusted telomere length measurements in leukocyte subsets from patients with short telomeres. Granulocytes age-adjusted telomere length is significantly different than all other leukocytes subtypes. (\*p<0.05, \*\* p<0.01, \*\*\* p<0.001 by ANOVA).

*Online supplements are not copyedited prior to posting.*

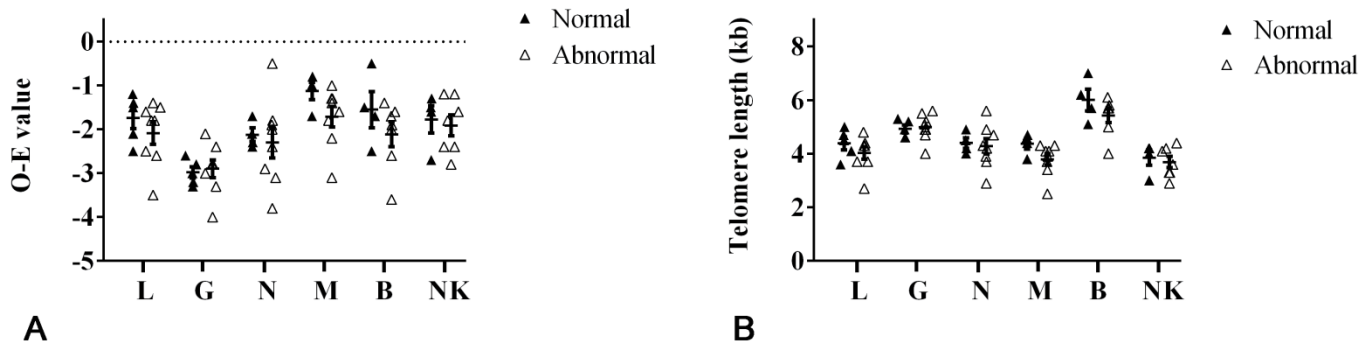

**Supplemental e-Figure 2:** Telomere length measurements in leukocyte subsets from patients with short telomeres with (open triangle) and without (black triangle) bone marrow abnormalities. Leukocyte subtypes that were tested: lymphocytes (L) (n= 5▲, 8△), granulocytes (G) (n= 5▲, 8△), “naïve” T lymphocytes (CD45RA+) (N) (n= 4▲, 8△), memory T lymphocytes (CD45RA-) (M) (n= 4▲, 8△), B lymphocytes (CD20+) (B) (n= 4▲, 7△), and natural killer (CD57+) (NK) (n= 4▲, 7△). Shown are samples represented by a triangle as well as mean and standard deviation of each subtype. In A) difference in telomere length between observed – expected value at the 50<sup>th</sup> percentile. Dotted line represents no difference between observed and expected telomere-length. In B) absolute telomere length is shown. No statistically significant difference was observed between normal and abnormal bone marrow groups in all subtypes.

*Online supplements are not copyedited prior to posting.*
